# Supplementary material for: The History of Engineered Tracheal Replacements: Interpreting the Past and Guiding the Future
Source: PubMed Central journal article supplement — Tissue Eng Part B Rev. 2021 Aug 11;27(4):341–52. doi: 10.1089/ten.teb.2020.0238 (PMC8390779; doi:10.1089/ten.teb.2020.0238), 2021-08-11
Supplement: Supp_TableS1.pdf [file Supp_TableS1.pdf]

| n   | Year pub. | PI            | Location         | Hospital               | Age | M/F | Condition | Scaffold                                    | Complications                                                                 | Max Follow-up | Failure Mode                        | Citation  |
|-----|-----------|---------------|------------------|------------------------|-----|-----|-----------|---------------------------------------------|-------------------------------------------------------------------------------|---------------|-------------------------------------|-----------|
| [1] | 1896      | Koenig        |                  |                        |     |     | fistula   | cutaneous flap + rib                        |                                                                               |               |                                     | [1]       |
| 1   | 1898      | Bruns         |                  |                        |     | M   | stenosis  | "tracheal cannula"                          |                                                                               | died 5 y      | stricture & collapse                | [2]       |
| 1   | 1927      | Fairchild     |                  |                        |     |     | trauma    | skin tube                                   |                                                                               |               |                                     | [1] [2]   |
| 1   | 1945      | Crafoord      |                  |                        |     |     |           | cutaneous flap containing costal cartilage  |                                                                               |               |                                     | [2]       |
| 1   | 1948      | Clagett       | Rochester, MN    | Mayo Clinic            | 55  | M   | tumor     | polyethylene tube                           | bronchopneumonia at 4 d                                                       | died 6 d      | tube blocked bronchus of upper lobe | [11]      |
| 1   | 1948      | Longmire      | Baltimore, MD    | Johns Hopkins Hospital | 10  | M   | trauma    | Lucite stent prosthesis + tracheostomy tube | tried to remove tube at 10.5 m, had to replace                                | alive 10.5 m  |                                     | [14] [25] |
| 1   | 1948      | Gibbon        | Philadelphia, PA |                        |     |     | tumor     | pleura + costal cartilage                   | bronchoscopic dilation                                                        | alive 8 m     |                                     | [9]       |
| 1   | 1948      | Rob & Bateman | London, England  | St. Thomas' Hospital   |     | M   | tumor     | fascia lata + tantalum gauze                | bronchial aspirations, cauterizing, polyp                                     | alive 1 y     |                                     | [1]       |
| 1   | 1950      | Belsey        | Bristol, England |                        | 42  | F   | tumor     | steel wire + thigh fascia                   | tumor recurrence, patch leak                                                  | died 2 y      | recurrence                          | [18]      |
| 1   | 1950      | Belsey        | Bristol, England |                        | 41  | F   | tumor     | steel wire + thigh fascia                   | collapse, 50% narrowing                                                       | alive 1 y     |                                     | [18]      |
| 1   | 1950      | Jarvis        | Seattle, WA      |                        | 33  | M   | tumor     | stainless steel tube                        | tried to remove tube at 1 y, had to replace                                   | died 33 m     | recurrence                          | [20]      |
| 1   | 1950      | Holmes        | Boise, ID        |                        |     | M   | trauma    | vitalium tube                               | multiple dilations, replaced w stainless steel                                | alive 1 m     |                                     | [20]      |
| 1   | 1950      | Gebauer       | Honolulu, HI     | Leahi Hospital         | 29  | F   | TB        | steel wire + fascia                         | bronchoscopies to clean secretions, removed some wire                         | alive 1 y     |                                     | [19]      |
| 1   | 1950      | Gebauer       | Honolulu, HI     | Leahi Hospital         | 38  | F   | TB        | steel wire + fascia                         |                                                                               | alive 1 y     |                                     | [19]      |
| 1   | 1950      | Gebauer       | Honolulu, HI     | Leahi Hospital         | 24  | F   | TB        | steel wire + fascia                         | tissue around graft collapsing                                                | alive 1 y     |                                     | [19]      |
| 1   | 1950      | Gebauer       | Honolulu, HI     | Leahi Hospital         | 26  | F   | TB        | steel wire + fascia                         | cut protruding wire                                                           | alive 1 y     |                                     | [19]      |
| 1   | 1950      | Gebauer       | Honolulu, HI     | Leahi Hospital         | 31  | F   | TB        | steel wire + fascia                         | 6 bronchial dilations                                                         | alive 1 y     |                                     | [20]      |
| 1   | 1950      | Gebauer       | Honolulu, HI     | Leahi Hospital         | 28  | F   | TB        | steel wire + fascia                         | cough, moderate bronchorrhea, daily mucus, granulation, protruding wire loops | alive 14 m    |                                     | [20]      |
| 1   | 1950      | Gebauer       | Honolulu, HI     | Leahi Hospital         | 34  | M   | TB        | steel wire + fascia                         | pneumonectomy at 1 y                                                          | alive 1 y     |                                     | [21]      |
| 1   | 1950      | Gebauer       | Honolulu, HI     | Leahi Hospital         | 30  | M   | TB        | steel wire + fascia                         | little cough                                                                  | alive 11 m    |                                     | [20]      |
| 1   | 1950      | Gebauer       | Honolulu, HI     | Leahi Hospital         | 50  | F   | TB        | steel wire + fascia                         |                                                                               | alive 10 m    |                                     | [20]      |
| 1   | 1950      | Gebauer       | Honolulu, HI     | Leahi Hospital         | 49  | F   | TB        | steel wire + fascia                         | mucous plug                                                                   | alive 10 m    |                                     | [20]      |
| 1   | 1950      | Gebauer       | Honolulu, HI     | Leahi Hospital         | 26  | F   | TB        | steel wire + fascia                         | edema and collapse, secretions                                                | died 3.5 d    | narrowed airway                     | [22]      |
| 1   | 1951      | Gebauer       | Honolulu, HI     | Leahi Hospital         |     |     | stenosis  | dermal graft                                |                                                                               | alive 10 m    |                                     | [16]      |
| 1   | 1951      | Gebauer       | Honolulu, HI     | Leahi Hospital         |     |     | stenosis  | dermal graft                                |                                                                               | alive 4 m     |                                     | [16]      |
| 2   | 1951      | Ravitch       | Baltimore, MD    | Johns Hopkins Hospital |     |     | tumor     | dermis + tantalum mesh                      |                                                                               | died 12 d     | hemorrhage                          | [16]      |
| 1   | 1952      | Clagett       | Rochester, MN    | Mayo Clinic            | 60  | F   | tumor     | steel wire + fascia + gelatin sponge        |                                                                               | alive 1 y     |                                     | [12]      |
| 1   | 1952      | Clagett       | Rochester, MN    | Mayo Clinic            | 59  | M   | tumor     | polyethylene tube + fascia                  | widespread metastasis                                                         | died < 2 y    | recurrence                          | [12]      |

|   |      |                 |                   |                               |     |   |            |                                                   |                                                             |               |                                   |              |
|---|------|-----------------|-------------------|-------------------------------|-----|---|------------|---------------------------------------------------|-------------------------------------------------------------|---------------|-----------------------------------|--------------|
| 1 | 1952 | Clagett         | Rochester, MN     | Mayo Clinic                   | 50  | M | tumor      | steel wire + fascia + gelatin sponge              | considerable granulation around wire, narrowed lumen, cough | alive 11 m    |                                   | [12]         |
| 1 | 1952 | Cahan           | New York, NY      | Memorial Hospital             | 18  | M | tumor      | fascia lata + tantalum gauze, w tracheotomy       | granulation tissue                                          | alive 1 y 4 m |                                   | [17]         |
| 1 | 1952 | Cotton & Penido | Beverly Hills, CA |                               | 58  | M | tumor      | stainless steel tube                              | polyp removals, reposition slipped tube, replaced tube      | alive 16 m    |                                   | [2]          |
| 1 | 1952 | Cotton & Penido | Beverly Hills, CA |                               | 53  | M | tumor      | stainless steel tube                              |                                                             | alive 6 m     |                                   | [2]          |
| 1 | 1952 | Cotton & Penido |                   |                               |     |   | aneurism   | stainless steel tube                              |                                                             | died 3 m      |                                   | [2]          |
| 1 | 1952 | Kergin          | Toronto, Canada   | Toronto General Hospital      | 51  | M | tumor      | pericardium patch + gelfoam strip // pedicle flap | roentgen therapy, heart attack                              | died 3 d      | mucous plug blocked left bronchus | [72]         |
| 1 | 1953 | Craig           | Livermore, CA     |                               | 63  | M | tumor      | polyethylene tube                                 |                                                             | died 5 d      | right lung collapsed              | [13]         |
| 1 | 1954 | Edgerton        | Baltimore, MD     | Johns Hopkins Hospital        | 0.5 | M | tumor      | thigh fascia around foam rubber support           |                                                             | alive 10 d    |                                   | [15]         |
| 1 | 1954 | Edgerton        | Baltimore, MD     | Johns Hopkins Hospital        | 18  | M | trauma     | thigh fascia around foam rubber support           |                                                             | alive 6 m     |                                   | [15]         |
| 1 | 1954 | Edgerton        | Baltimore, MD     | Johns Hopkins Hospital        | 19  | F | laryngitis | thigh fascia around foam rubber support           |                                                             | alive 6 w     |                                   | [15]         |
| 1 | 1954 | Edgerton        | Baltimore, MD     | Johns Hopkins Hospital        | 45  | F | tumor      | wire rods and pedicle flaps                       |                                                             | alive 2 w     |                                   | [15]         |
| 1 | 1954 | Edgerton        | Baltimore, MD     | Johns Hopkins Hospital        | 62  | F | stenosis   | pedicle flap + skin graft around acrylic tube     |                                                             | alive 1 y     |                                   | [15]         |
| 1 | 1954 | Edgerton        | Baltimore, MD     | Johns Hopkins Hospital        | 56  | M | tumor      | dermis + tantalum mesh                            |                                                             | died 12 d     | hemorrhage                        | [15]         |
| 1 | 1954 | Edgerton        | Baltimore, MD     | Johns Hopkins Hospital        | 41  | M | tumor      | dermis + tantalum mesh                            |                                                             | died 3 m      | mesh obstructing airway           | [15]         |
| 1 | 1955 | Abbott          | Atlanta, GA       | Emory University              |     |   | tumor      | pyrex glass tube + pleural graft                  | stenosis                                                    | died 9 m      | recurrence                        | [34]         |
| 1 | 1956 | Keshishian      | Washington, DC    |                               | 42  | F | stricture  | steel spring + fascia lata                        |                                                             | died 2 d      | suffocation by secretions         | [23]         |
| 1 | 1956 | Waterman        | Knoxville, TN     |                               | 20  | F | trauma     | stainless steel tube + dermal graft               |                                                             | died 10 d     | hemorrhage                        | [23]         |
| 1 | 1956 | Stranahan       | Albany, NY        |                               | 38  | F | tumor      | stainless steel mesh + pleuropericostial graft    |                                                             | alive 3.5 m   |                                   | [23]         |
| 1 | 1958 | Taber           | Columbus, Ohio    | Henry Ford Hospital           | 37  | F | tumor      | ivalon sponge + stainless steel spring            |                                                             | died 22 d     | hemorrhage                        | [26]         |
| 1 | 1962 | Ellis           | Houston, TX       | Jefferson Davis Hospital      | 49  | M | tumor      | marlex mesh tracheostomy                          | recurrence at 6 m                                           | alive 2.5 y   |                                   | [27]         |
| 1 | 1963 | Beall           | Houston, TX       | St. Luke's Episcopal Hospital | 61  | F | tumor      | marlex mesh                                       |                                                             | alive 4.5 m   |                                   | [28]         |
| 1 | 1963 | Kramish         | Denver, CO        | CU Medical Center             | 45  | F | tumor      | stainless steel mesh / marlex mesh                | 8 dilations, 1 replacement                                  | alive 18 m    |                                   | [24]         |
| 1 | 1963 | Kramish         | Denver, CO        | CU Medical Center             | 57  | M | tumor      | marlex mesh                                       |                                                             | died 9 m      | suffocation by secretions         | [24]         |
| 1 | 1968 | Pearson         | Toronto, Canada   | University of Toronto         | 15  | F | tumor      | marlex mesh                                       | graft removed at 5 y                                        | died 29 y     | recurrence                        | [29]<br>[36] |
| 1 | 1968 | Pearson         | Toronto, Canada   | University of Toronto         | 48  | M | tumor      | marlex mesh + internal mucosal graft              |                                                             | died 22 m     | infection, granulation            | [29]         |
| 1 | 1972 | Neville         | Chicago, IL       | West Suburban Hospital        |     | F | tumor      | bifurcated silicone prosthesis                    | indefinite intubation                                       | alive 11 y    | pulmonary insufficiency           | [37]         |
| 1 | 1974 | Arbulu          | Detroit, MI       |                               |     |   | stenosis   |                                                   |                                                             | died 10 d     | hemorrhage                        | [30]         |
| 8 | 1974 | Arbulu          | Detroit, MI       |                               |     |   | stenosis   | + pericardial flap                                |                                                             | alive         |                                   | [30]         |
| 1 | 1974 | Pearson         | Toronto, Canada   | University of Toronto         |     |   | tumor      | marlex mesh                                       |                                                             | died 2 w      | hemorrhage                        | [30]         |

|   |      |              |                       |                                         |    |   |                   |                                       |                                                                            |             |                                 |      |
|---|------|--------------|-----------------------|-----------------------------------------|----|---|-------------------|---------------------------------------|----------------------------------------------------------------------------|-------------|---------------------------------|------|
| 1 | 1974 | Pearson      | Toronto, Canada       | University of Toronto                   |    |   | tumor             | marlex mesh                           |                                                                            | died 2 w    | hemorrhage                      | [30] |
| 1 | 1974 | Pearson      | Toronto, Canada       | University of Toronto                   |    |   | tumor             | marlex mesh                           |                                                                            | died 2 w    | hemorrhage                      | [30] |
| 1 | 1974 | Pearson      | Toronto, Canada       | University of Toronto                   |    |   | tumor             | marlex mesh                           |                                                                            | died 3 w    |                                 | [30] |
| 1 | 1974 | Pearson      | Toronto, Canada       | University of Toronto                   |    |   | tumor             | marlex mesh                           |                                                                            | died 8 y    | recurrence                      | [30] |
| 1 | 1975 | Moghissi     | Hull, England         | Castle Hill Hospital                    | 38 | M | tumor             | marlex mesh + pericardium             |                                                                            | alive 4 y   |                                 | [31] |
| 1 | 1975 | Moghissi     | Hull, England         | Castle Hill Hospital                    | 65 | M | tumor             | marlex mesh + pericardium             |                                                                            | died 6 w    | hemorrhage                      | [31] |
| 1 | 1976 | Neville      | Newark, NJ            | New Jersey Med School                   | 49 | F | tumor             | bifurcated silicone prosthesis        |                                                                            | alive 5 y   |                                 | [38] |
| 1 | 1976 | Neville      | Newark, NJ            | New Jersey Med School                   | 19 | M | trauma            | straight silicone prosthesis          | graft migration                                                            | alive 16 m  |                                 | [38] |
| 1 | 1976 | Neville      | Newark, NJ            | New Jersey Med School                   | 31 | M | tracheomalacia    | straight silicone prosthesis          |                                                                            | died 5 m    | drug overdose                   | [38] |
| 1 | 1976 | Neville      | Newark, NJ            | New Jersey Med School                   | 49 | F | tumor             | straight silicone prosthesis          |                                                                            | alive       |                                 | [38] |
| 4 | 1976 | Neville      | Newark, NJ            | New Jersey Med School                   |    |   | tumor             | bifurcated silicone prosthesis        |                                                                            | alive 1 y + |                                 | [38] |
| 1 | 1976 | Neville      | Newark, NJ            | New Jersey Med School                   |    |   | tumor             | bifurcated silicone prosthesis        |                                                                            | died 3 w    | pulmonary insufficiency         | [38] |
| 1 | 1976 | Neville      | Newark, NJ            | New Jersey Med School                   |    |   | tumor             | bifurcated silicone prosthesis        | granulomas                                                                 | died 15 m   | recurrence                      | [38] |
| 1 | 1976 | Neville      | Newark, NJ            | New Jersey Med School                   |    |   | tumor             | bifurcated silicone prosthesis        | granulomas                                                                 | died 18 m   | recurrence                      | [38] |
| 5 | 1976 | Neville      | Newark, NJ            | New Jersey Med School                   |    |   | tumor / stricture | straight silicone prosthesis          |                                                                            | alive       |                                 | [38] |
| 1 | 1976 | Neville      | Newark, NJ            | New Jersey Med School                   |    |   | tumor / stricture | straight silicone prosthesis          |                                                                            | died 14 d   | hemorrhage                      | [38] |
| 4 | 1976 | Neville      | Newark, NJ            | New Jersey Med School                   |    |   | tumor / stricture | straight silicone prosthesis          | granulomas, graft migration, right pneumonectomy                           | died < 2 y  | arrhythmia, recurrence          | [38] |
| 1 | 1976 | Neptune      | Boston, MA            |                                         | 65 | M | tumor             | silicone prosthesis                   |                                                                            | alive 6 m   |                                 | [38] |
| 1 | 1976 | Mark         | Stanford, CA          |                                         | 68 | M | tumor             | silicone prosthesis                   | difficult cough                                                            | alive < 1 m |                                 | [38] |
| 1 | 1979 | Rose         | Cologne, West Germany | ENT Clinic, University Hospital Cologne | 21 | M | stenosis          | heterotopic/orthotopic allotransplant |                                                                            | alive 9 w   |                                 | [49] |
| 1 | 1985 | Vogt-Moykopt | Germany               |                                         | 49 | M | tumor             | silicone prosthesis                   |                                                                            | died 2 m    | heart failure                   | [39] |
| 1 | 1985 | Vogt-Moykopt | Germany               |                                         | 29 | F | tumor             | silicone prosthesis (bifurcated)      | sputum retention, vocal cord paralysis, metastasis                         | died 4 m    | recurrence                      | [39] |
| 1 | 1985 | Vogt-Moykopt | Germany               |                                         | 55 | M | tumor             | silicone prosthesis (bifurcated)      | severe venous bleeding during procedure                                    | died 10 d   | cardiorespiratory insufficiency | [39] |
| 1 | 1985 | Vogt-Moykopt | Germany               |                                         | 55 | F | tracheomalacia    | silicone prosthesis                   | erosion (goretex patch was meant to prevent this, but ended up causing it) | died 15 d   | hemorrhage                      | [39] |
| 1 | 1985 | Vogt-Moykopt | Germany               |                                         | 55 | M | tumor             | silicone prosthesis                   | loosening of prosthesis                                                    | died 7 m    | septicemia                      | [39] |
| 1 | 1985 | Vogt-Moykopt | Germany               |                                         | 54 | M | tracheomalacia    | silicone prosthesis                   | sputum retention, loosening of prosthesis, changed prosthesis              | died 10 m   | hemorrhage                      | [39] |
| 1 | 1985 | Vogt-Moykopt | Germany               |                                         | 58 | M | tumor             | silicone prosthesis                   |                                                                            | died 4 m    | recurrence                      | [39] |
| 1 | 1985 | Vogt-Moykopt | Germany               |                                         | 50 | M | tumor             | silicone prosthesis (bifurcated)      | granulation tissue, laser coagulation                                      | alive 13 m  |                                 | [39] |

|   |      |                |                        |                                                   |      |   |                |                                            |                                                 |                   |                                 |      |
|---|------|----------------|------------------------|---------------------------------------------------|------|---|----------------|--------------------------------------------|-------------------------------------------------|-------------------|---------------------------------|------|
| 1 | 1985 | Vogt-Moykopt   | Germany                |                                                   | 63   | M | tumor          | silicone prosthesis (bifurcated)           | sputum retention, necrosis of upper anastomosis | died 8 d          | cardiorespiratory insufficiency | [39] |
| 1 | 1990 | Neville, W. E. | Newark, NJ             | New Jersey Med School                             |      |   | tumor          | silicone prosthesis (bifurcated)           |                                                 | died 1 y          |                                 | [40] |
| 1 | 1990 | Neville, W. E. | Newark, NJ             | New Jersey Med School                             |      |   | tumor          | silicone prosthesis (bifurcated)           |                                                 | died 2 y          |                                 | [40] |
| 1 | 1990 | Neville, W. E. | Newark, NJ             | New Jersey Med School                             |      |   | tumor          | silicone prosthesis (bifurcated)           | changed graft periodically over 5 y             | died 11 y         |                                 | [40] |
| 1 | 1990 | Neville, W. E. | Newark, NJ             | New Jersey Med School                             |      |   | tumor          | silicone prosthesis (bifurcated)           | suture granuloma                                | alive 5 y         |                                 | [40] |
| 1 | 1990 | Neville, W. E. | Newark, NJ             | New Jersey Med School                             |      |   | tumor          | silicone prosthesis (bifurcated)           | suture granuloma                                | alive 3 y         |                                 | [40] |
| 1 | 1990 | Neville, W. E. | Newark, NJ             | New Jersey Med School                             |      |   | tumor          | silicone prosthesis (bifurcated)           | shift of prosthesis                             | alive 1.5 y       |                                 | [40] |
| 1 | 1990 | Neville, W. E. | Newark, NJ             | New Jersey Med School                             |      |   | tumor          | silicone prosthesis (bifurcated)           | shift of prosthesis                             | alive 2.5 y       |                                 | [40] |
| 1 | 1990 | Neville, W. E. | Newark, NJ             | New Jersey Med School                             |      |   | tumor          | silicone prosthesis (bifurcated)           |                                                 | died 2 y          | recurrence                      | [40] |
| 6 | 1990 | Neville, W. E. | Newark, NJ             | New Jersey Med School                             |      |   | benign disease | silicone prosthesis                        |                                                 | lost to follow-up |                                 | [40] |
| 3 | 1990 | Neville, W. E. | Newark, NJ             | New Jersey Med School                             |      |   | benign disease | silicone prosthesis                        | anastomotic granuloma                           | died 3 y          |                                 | [40] |
| 3 | 1990 | Neville, W. E. | Newark, NJ             | New Jersey Med School                             |      |   | benign disease | silicone prosthesis                        | anastomotic granuloma                           | died 7 y          |                                 | [40] |
| 1 | 1990 | Neville, W. E. | Newark, NJ             | New Jersey Med School                             |      |   | benign disease | silicone prosthesis                        | subglottic granuloma, tracheotomy               | died 2 y          |                                 | [40] |
| 1 | 1990 | Neville, W. E. | Newark, NJ             | New Jersey Med School                             |      |   | benign disease | silicone prosthesis                        | subglottic granuloma                            | died 3 y          |                                 | [40] |
| 1 | 1990 | Neville, W. E. | Newark, NJ             | New Jersey Med School                             |      |   | benign disease | silicone prosthesis                        |                                                 | died 5 y          | dehiscence                      | [40] |
| 1 | 1990 | Neville, W. E. | Newark, NJ             | New Jersey Med School                             |      |   | benign disease | silicone prosthesis                        |                                                 | died 15 y         | pulmonary insufficiency         | [40] |
| 1 | 1990 | Neville, W. E. | Newark, NJ             | New Jersey Med School                             |      |   | benign disease | silicone prosthesis                        |                                                 | died 6 m          | stroke                          | [40] |
| 1 | 1990 | Neville, W. E. | Newark, NJ             | New Jersey Med School                             |      |   | benign disease | silicone prosthesis                        |                                                 | died 1 y          | arrhythmia                      | [40] |
| 1 | 1990 | Neville, W. E. | Newark, NJ             | New Jersey Med School                             |      |   | benign disease | silicone prosthesis                        |                                                 | died 10 m         | MI                              | [40] |
| 1 | 1990 | Neville, W. E. | Newark, NJ             | New Jersey Med School                             |      |   | benign disease | silicone prosthesis                        |                                                 | died 1 y          | pneumonia                       | [40] |
| 5 | 1990 | Neville, W. E. | Newark, NJ             | New Jersey Med School                             |      |   | tumor          | silicone prosthesis                        |                                                 | survived 1-8 y    | 2x recurrence                   | [40] |
| 2 | 1990 | Neville, W. E. | Newark, NJ             | New Jersey Med School                             |      |   | tumor          | silicone prosthesis                        |                                                 | died 1.5 y        | recurrence                      | [40] |
| 1 | 1993 | Levashov       | St. Petersburg, Russia |                                                   | 24   | F | stenosis       | preserved allograft – Eurocollins solution | graft necrosis, rejection, stenting             | alive 1 y         |                                 | [47] |
| 1 | 1996 | Pearson        | Toronto, Canada        | University of Toronto                             |      |   | tumor          | marlex mesh                                |                                                 | died at 2 w       | hemorrhage                      | [32] |
| 1 | 1996 | Pearson        | Toronto, Canada        | University of Toronto                             |      |   | tumor          | marlex mesh                                | pneumonia                                       | died at 10 d      | dehiscence                      | [32] |
| 1 | 1996 | Jacobs         | London, England        | Great Ormond Street, Hospital for Children (GOSH) | 16.6 |   | trauma         | preserved allograft - formalin             |                                                 | alive 9.96 y      |                                 | [3]  |
| 1 | 1996 | Jacobs         | London, England        | Great Ormond Street, Hospital for Children (GOSH) | 17.5 |   | trauma         | preserved allograft - formalin             |                                                 | alive 7.47 y      |                                 | [3]  |

|   |      |        |                 |                                                   |      |  |                      |                                |                           |              |                 |     |
|---|------|--------|-----------------|---------------------------------------------------|------|--|----------------------|--------------------------------|---------------------------|--------------|-----------------|-----|
| 1 | 1996 | Jacobs | London, England | Great Ormond Street, Hospital for Children (GOSH) | 18.3 |  | trauma               | preserved allograft - formalin |                           | alive 6.76 y |                 | [3] |
| 1 | 1996 | Jacobs | London, England | Great Ormond Street, Hospital for Children (GOSH) | 9.5  |  | trauma               | preserved allograft - formalin |                           | alive 9.11 y |                 | [3] |
| 1 | 1996 | Jacobs | London, England | Great Ormond Street, Hospital for Children (GOSH) | 6.4  |  | trauma               | preserved allograft - formalin |                           | alive 5.64 y |                 | [3] |
| 1 | 1996 | Jacobs | London, England | Great Ormond Street, Hospital for Children (GOSH) | 6.7  |  | trauma               | preserved allograft - formalin |                           | alive 8.16 y |                 | [3] |
| 1 | 1996 | Jacobs | London, England | Great Ormond Street, Hospital for Children (GOSH) | 11.5 |  | trauma               | preserved allograft - formalin |                           | died         | cardiac failure | [3] |
| 1 | 1996 | Jacobs | London, England | Great Ormond Street, Hospital for Children (GOSH) | 4    |  | trauma               | preserved allograft - formalin |                           | alive 5.03 y |                 | [3] |
| 1 | 1996 | Jacobs | London, England | Great Ormond Street, Hospital for Children (GOSH) | 4.1  |  | congenital stenosis  | preserved allograft - formalin |                           | alive 4.76 y |                 | [3] |
| 1 | 1996 | Jacobs | London, England | Great Ormond Street, Hospital for Children (GOSH) | 5.6  |  | congenital stenosis  | preserved allograft - formalin |                           | alive 1.37 y |                 | [3] |
| 1 | 1996 | Jacobs | London, England | Great Ormond Street, Hospital for Children (GOSH) | 11.4 |  | prolonged intubation | preserved allograft - formalin |                           | alive 4.41 y |                 | [3] |
| 1 | 1996 | Jacobs | London, England | Great Ormond Street, Hospital for Children (GOSH) | 9.7  |  | prolonged intubation | preserved allograft - formalin | stented tracheostomy tube | alive 0.39 y |                 | [3] |
| 1 | 1996 | Jacobs | London, England | Great Ormond Street, Hospital for Children (GOSH) | 13.4 |  | prolonged intubation | preserved allograft - formalin | stent                     | alive 2.06 y |                 | [3] |
| 1 | 1996 | Jacobs | London, England | Great Ormond Street, Hospital for Children (GOSH) | 15.5 |  | prolonged intubation | preserved allograft - formalin | still being treated       | alive 2 y    |                 | [3] |
| 1 | 1996 | Jacobs | London, England | Great Ormond Street, Hospital for Children (GOSH) | 17.9 |  | prolonged intubation | preserved allograft - formalin | still being treated       | alive 1.59 y |                 | [3] |
| 1 | 1996 | Jacobs | London, England | Great Ormond Street, Hospital for Children (GOSH) | 5    |  | congenital stenosis  | preserved allograft - formalin |                           | alive 1.38 y |                 | [3] |
| 1 | 1996 | Jacobs | London, England | Great Ormond Street, Hospital                     | 5.6  |  | trauma               | preserved allograft - formalin | still being treated       | alive 0.43 y |                 | [3] |

|   |      |        |                 |                                                   |     |   |                                               |                                |                                                              |              |                |     |
|---|------|--------|-----------------|---------------------------------------------------|-----|---|-----------------------------------------------|--------------------------------|--------------------------------------------------------------|--------------|----------------|-----|
|   |      |        |                 | for Children (GOSH)                               |     |   |                                               |                                |                                                              |              |                |     |
| 1 | 1996 | Jacobs | London, England | Great Ormond Street, Hospital for Children (GOSH) | 1.6 |   | congenital stenosis                           | preserved allograft - formalin |                                                              | alive 0.44 y |                | [3] |
| 1 | 1996 | Jacobs | London, England | Great Ormond Street, Hospital for Children (GOSH) | 5.1 |   | congenital stenosis                           | preserved allograft - formalin |                                                              | died 18 m    | GI problems    | [3] |
| 1 | 1996 | Jacobs | London, England | Great Ormond Street, Hospital for Children (GOSH) | 8.2 |   | congenital stenosis                           | preserved allograft - formalin |                                                              | alive 1.88 y |                | [3] |
| 1 | 1996 | Jacobs | London, England | Great Ormond Street, Hospital for Children (GOSH) | 1.5 |   | congenital stenosis                           | preserved allograft - formalin |                                                              | alive 1.71 y |                | [3] |
| 1 | 1996 | Jacobs | London, England | Great Ormond Street, Hospital for Children (GOSH) | 0.4 |   | congenital stenosis                           | preserved allograft - formalin |                                                              | died 10 d    | hemorrhage     | [3] |
| 1 | 1996 | Jacobs | London, England | Great Ormond Street, Hospital for Children (GOSH) | 0.4 |   | congenital stenosis                           | preserved allograft - formalin | still being treated                                          | alive 1.2 y  |                | [3] |
| 1 | 1996 | Jacobs | London, England | Great Ormond Street, Hospital for Children (GOSH) | 0.5 |   | congenital stenosis                           | preserved allograft - formalin |                                                              | died 3.5 m   | airway failure | [3] |
| 1 | 1996 | Jacobs | London, England | Great Ormond Street, Hospital for Children (GOSH) | 1.5 | F | congenital stenosis                           | preserved allograft - formalin | silicone stent                                               | alive 16 m   |                | [3] |
| 1 | 1998 | Backer | Chicago, IL     | Children's Memorial Hospital                      | 0.2 |   | congenital stenosis (complete tracheal rings) | autograft w pericardial patch  |                                                              | alive 20 m   |                | [6] |
| 1 | 1998 | Backer | Chicago, IL     | Children's Memorial Hospital                      | 0.4 |   | congenital stenosis (complete tracheal rings) | autograft                      |                                                              | alive 14 m   |                | [6] |
| 1 | 1998 | Backer | Chicago, IL     | Children's Memorial Hospital                      | 0.2 |   | congenital stenosis (complete tracheal rings) | autograft w pericardial patch  | stenosis at pericardial patch, stent and tracheostomy at 4 m | alive 12 m   |                | [6] |
| 1 | 1998 | Backer | Chicago, IL     | Children's Memorial Hospital                      | 0.1 |   | congenital stenosis (complete tracheal rings) | autograft w pericardial patch  |                                                              | alive 10 m   |                | [6] |
| 1 | 1998 | Backer | Chicago, IL     | Children's Memorial Hospital                      | 1   |   | congenital stenosis (complete tracheal rings) | autograft w pericardial patch  |                                                              | alive 5 m    |                | [6] |
| 1 | 1998 | Backer | Chicago, IL     | Children's Memorial Hospital                      | 0.7 |   | congenital stenosis (complete tracheal rings) | autograft                      |                                                              | alive 2 m    |                | [6] |

|    |      |              |                            |                                |      |   |                      |                                       |                                                                                                                                       |                                     |                               |      |
|----|------|--------------|----------------------------|--------------------------------|------|---|----------------------|---------------------------------------|---------------------------------------------------------------------------------------------------------------------------------------|-------------------------------------|-------------------------------|------|
| 1  | 1999 | Jacobs       | North America              |                                | 15.3 |   | trauma               | fixed allograft                       | stent, malacia                                                                                                                        | alive 2.44 y                        |                               | [4]  |
| 1  | 1999 | Jacobs       | North America              |                                | 29   |   | trauma               | fixed allograft                       | stent, malacia                                                                                                                        | alive 2.37 y                        |                               | [4]  |
| 1  | 1999 | Jacobs       | North America              |                                | 11.8 |   | congenital stenosis  | fixed allograft                       | stent, restent, granulation                                                                                                           | alive 2.1 y                         |                               | [4]  |
| 1  | 1999 | Jacobs       | North America              |                                | 39.4 |   | tumor                | fixed allograft                       |                                                                                                                                       | died 12 d                           | hemorrhage                    | [4]  |
| 1  | 1999 | Jacobs       | North America              |                                | 2.6  |   | congenital stenosis  | fixed allograft                       | tracheostomy                                                                                                                          | alive 0.92 y                        |                               | [4]  |
| 1  | 1999 | Jacobs       | North America              |                                | 21   |   | stenosis             | fixed allograft                       | tracheostomy                                                                                                                          | alive 0.57 y                        |                               | [4]  |
| 1  | 1999 | Jacobs       | International              |                                | 1.7  |   | congenital stenosis  | fixed allograft                       |                                                                                                                                       | died 4 m                            | hemorrhage                    | [4]  |
| 1  | 1999 | Jacobs       | International              |                                | 2.8  |   | prolonged intubation | fixed allograft                       | stenosis, replacement graft                                                                                                           | alive 5 m - 14 y (over 26 patients) |                               | [4]  |
| 1  | 1999 | Jacobs       | International              |                                | 4.7  |   | prolonged intubation | fixed allograft                       |                                                                                                                                       | alive 5 m - 14 y (over 26 patients) |                               | [4]  |
| 1  | 1999 | Jacobs       | International              |                                | 8.2  |   | trauma               | fixed allograft                       |                                                                                                                                       | alive 5 m - 14 y (over 26 patients) |                               | [4]  |
| 1  | 2001 | Vogt-Moykopt | Germany                    |                                | 55.5 |   | tumor                | silicone prosthesis                   |                                                                                                                                       | died 5 d                            | mediastinitis                 | [41] |
| 1  | 2001 | Hoffman      | Philadelphia, PA           |                                | 38   | F | stricture            | aortic autograft                      | tracheostomy                                                                                                                          | alive 1 y                           |                               | [58] |
| 33 | 2003 | Delaere      | Leuven, Belgium            | University Hospital Leuven     |      |   | tumor                | heterotopic/orthotopic allotransplant |                                                                                                                                       |                                     | 5 recurrences of which 4 died | [50] |
| 5  | 2003 | Delaere      | Leuven, Belgium            | University Hospital Leuven     |      |   | tumor                | heterotopic/orthotopic allotransplant |                                                                                                                                       | alive 8 m                           |                               | [50] |
| 1  | 2004 | Klepetko     | Vienna, Austria            | University Hospital of Vienna  | 57   | M | prolonged intubation | heterotopic/orthotopic allotransplant |                                                                                                                                       | alive 31 m                          |                               | [56] |
| 1  | 2005 | Spaggiari    | Milan, Italy               | European Institute of Oncology | 38   | M | tumor                | autograft                             | stenosis & stent, ARDS & MV at 21 d                                                                                                   | alive 24 m                          |                               | [5]  |
| 1  | 2005 | Olias        | Lisbon, Portugal           | Portuguese Cancer Institute    | 25   | M | prolonged intubation | heterotopic/orthotopic autograft      | pooling of secretions at upper anastomosis                                                                                            | alive 6 m                           |                               | [57] |
| 1  | 2006 | Azorin       | Limoges, France            | Academic Hospital of Limoges   | 68   | M | tumor                | aortic autograft                      | granulation at proximal anastomosis, stent, stent migration                                                                           | died 6 m                            | pneumonia, ARDS               | [62] |
| 1  | 2009 | Davidson     | Johannesburg, South Africa | University of Witwatersrand    | 33   | M | trauma               | aortic autograft                      |                                                                                                                                       | died 10 d                           | dehiscence, mediastinitis     | [59] |
| 1  | 2010 | Wurtz        | Lille, France              | Academic Hospital of Lille     | 46   | M | tumor                | aortic allograft                      | dehiscence, sternoplasty, esophageal fistula                                                                                          | died 45 m                           | recurrence                    | [60] |
| 1  | 2010 | Wurtz        | Lille, France              | Academic Hospital of Lille     | 17   | M | tumor                | aortic allograft                      | esophageal fistula, acute anterior spinal cord ischemia                                                                               | died 26 m                           | hemorrhage (during re-op)     | [60] |
| 1  | 2010 | Wurtz        | Lille, France              | Academic Hospital of Lille     | 30   | M | tumor                | cryopreserved aortic allograft        | multiple stent replacements, pneumonia, tracheotomy, partial disruption of lower anastomosis                                          | alive 42 m                          |                               | [60] |
| 1  | 2010 | Wurtz        | Lille, France              | Academic Hospital of Lille     | 27   | F | tumor                | cryopreserved aortic allograft        | necrosis from fungal infection, retransplantation, graft disruption, tracheostomy, fistula between neocarina and esophagus, ARDS & MV | alive 34 m                          |                               | [60] |

|   |      |                |                   |                                                   |    |   |                     |                                               |                                         |             |            |                      |
|---|------|----------------|-------------------|---------------------------------------------------|----|---|---------------------|-----------------------------------------------|-----------------------------------------|-------------|------------|----------------------|
| 1 | 2010 | Wurtz          | Lille, France     | Academic Hospital of Lille                        | 52 | M | tumor               | cryopreserved aortic allograft                |                                         | alive 34 m  |            | [60]                 |
| 1 | 2010 | Wurtz          | Lille, France     | Academic Hospital of Lille                        | 35 | M | tumor               | cryopreserved aortic allograft                |                                         | alive 26 m  |            | [60]                 |
| 1 | 2010 | Delaere        | Leuven, Belgium   | University Hospital Leuven                        | 55 | F | stenosis            | heterotopic/orthotopic allotransplant         |                                         | alive 1 y   |            | [51]                 |
| 1 | 2011 | Martinod       | Bobigny, France   | Publique-Hôpitaux de Paris                        | 78 | M | tumor               | cryopreserved aortic allograft                |                                         | alive 1 y   |            | [63]                 |
| 1 | 2012 | Delaere        | Leuven, Belgium   | University Hospital Leuven                        | 45 | F | stenosis            | heterotopic/orthotopic allotransplant         | stricture                               |             |            | [52]<br>[54]         |
| 1 | 2012 | Delaere        | Leuven, Belgium   | University Hospital Leuven                        | 17 | M | stenosis            | heterotopic/orthotopic allotransplant         | stricture, tracheotomy                  |             |            | [52]<br>[54]         |
| 1 | 2012 | Delaere        | Leuven, Belgium   | University Hospital Leuven                        | 64 | M | tumor               | heterotopic/orthotopic allotransplant         |                                         | alive 2 y   |            | [52]<br>[53]<br>[54] |
| 1 | 2012 | Elliott        | London, England   | Great Ormond Street, Hospital for Children (GOSH) | 10 | M | congenital stenosis | decellularized allograft                      | 25 secretion clearings & stentings      | alive 4 y   |            | [65]                 |
| 1 | 2013 | Fabre (& Kolb) | Villejuif, France | Institut Gustave Roussy                           | 52 | M | tumor               | reinforced forearm free flap                  | ARDS                                    | alive 75 m  |            | [7]                  |
| 1 | 2013 | Fabre (& Kolb) | Villejuif, France | Institut Gustave Roussy                           | 38 | F | tumor               | reinforced anterolateral thigh free flap      | ARDS                                    | alive 66 m  |            | [7]                  |
| 1 | 2013 | Fabre (& Kolb) | Villejuif, France | Institut Gustave Roussy                           | 53 | F | tumor               | reinforced bifurcated forearm free flap       | ARDS, never extubated                   | died 23 d   |            | [7]                  |
| 1 | 2013 | Fabre (& Kolb) | Villejuif, France | Institut Gustave Roussy                           | 38 | M | tumor               | reinforced bifurcated forearm free flap       | ARDS treated w VV ECMO, never extubated | died 41 d   |            | [7]                  |
| 1 | 2013 | Fabre (& Kolb) | Villejuif, France | Institut Gustave Roussy                           | 50 | F | tumor               | reinforced forearm free flap                  |                                         | alive 41 m  |            | [7]                  |
| 1 | 2013 | Fabre (& Kolb) | Villejuif, France | Institut Gustave Roussy                           | 68 | M | stenosis            | reinforced forearm free flap + closed fistula | ARDS, endotracheal stenting             | alive 34 m  |            | [7]                  |
| 1 | 2013 | Fabre (& Kolb) | Villejuif, France | Institut Gustave Roussy                           | 40 | F | tumor               | reinforced forearm free flap                  |                                         | died 16 m   |            | [7]                  |
| 1 | 2013 | Fabre (& Kolb) | Villejuif, France | Institut Gustave Roussy                           | 68 | M | tumor               | reinforced forearm free flap                  | ARDS                                    | alive 20 m  |            | [7]                  |
| 1 | 2013 | Fabre (& Kolb) | Villejuif, France | Institut Gustave Roussy                           | 66 | F | stenosis            | reinforced forearm free flap                  | ARDS, tracheostomy                      | alive 18 m  |            | [7]                  |
| 1 | 2013 | Fabre (& Kolb) | Villejuif, France | Institut Gustave Roussy                           | 45 | M | tumor               | reinforced forearm free flap                  |                                         | died 6 m    | hemorrhage | [7]                  |
| 1 | 2015 | Zhang          | Shenyang, China   | Shengjing Hospital                                | 52 | F | tumor               | stented autograft                             | mild edema around anastomoses           | died 14 m   | hemoptysis | [33]                 |
| 1 | 2015 | Zhang          | Shenyang, China   | Shengjing Hospital                                | 39 | M | stenosis            | stented autograft                             | mild edema around anastomoses           | alive 84 m  |            | [33]                 |
| 1 | 2015 | Zhang          | Shenyang, China   | Shengjing Hospital                                | 38 | F | tumor               | stented autograft                             | mild edema around anastomoses           | alive 84 m  |            | [33]                 |
| 1 | 2015 | Zhang          | Shenyang, China   | Shengjing Hospital                                | 28 | M | tumor               | stented autograft                             | mild edema around anastomoses           | alive 84 m  |            | [33]                 |
| 1 | 2015 | Zhang          | Shenyang, China   | Shengjing Hospital                                | 31 | M | tumor               | stented autograft                             | mild edema around anastomoses           | alive 84 m  |            | [33]                 |
| 1 | 2016 | Loos, Delaere  | Leuven, Belgium   | University Hospital Leuven                        | 66 | M | tumor               | heterotopic/orthotopic allotransplant         |                                         | alive 146 m |            | [55]                 |
| 1 | 2016 | Loos, Delaere  | Leuven, Belgium   | University Hospital Leuven                        | 64 | M | tumor               | heterotopic/orthotopic allotransplant         |                                         | alive 145 m |            | [55]                 |
| 1 | 2016 | Loos, Delaere  | Leuven, Belgium   | University Hospital Leuven                        | 42 | M | tumor               | heterotopic/orthotopic allotransplant         |                                         | alive 143 m |            | [55]                 |
| 1 | 2016 | Loos, Delaere  | Leuven, Belgium   | University Hospital Leuven                        | 54 | M | tumor               | heterotopic/orthotopic allotransplant         |                                         | alive 142 m |            | [55]                 |



|   |      |               |                 |                                                   |    |   |                     |                                       |                                                                                 |             |                                                |      |
|---|------|---------------|-----------------|---------------------------------------------------|----|---|---------------------|---------------------------------------|---------------------------------------------------------------------------------|-------------|------------------------------------------------|------|
| 1 | 2016 | Loos, Delaere | Leuven, Belgium | University Hospital Leuven                        | 55 | M | tumor               | heterotopic/orthotopic allotransplant |                                                                                 | died 33 m   | other cause                                    | [55] |
| 1 | 2016 | Loos, Delaere | Leuven, Belgium | University Hospital Leuven                        | 63 | F | tumor               | heterotopic/orthotopic allotransplant | tracheocutaneous fistula & wound infection                                      | alive 128 m |                                                | [55] |
| 1 | 2016 | Loos, Delaere | Leuven, Belgium | University Hospital Leuven                        | 58 | F | tumor               | heterotopic/orthotopic allotransplant | pneumonia                                                                       | alive 126 m |                                                | [55] |
| 1 | 2016 | Loos, Delaere | Leuven, Belgium | University Hospital Leuven                        | 64 | M | tumor               | heterotopic/orthotopic allotransplant | tracheocutaneous fistula & pneumonia                                            | alive 126 m |                                                | [55] |
| 1 | 2016 | Loos, Delaere | Leuven, Belgium | University Hospital Leuven                        | 58 | M | tumor               | heterotopic/orthotopic allotransplant | tracheostomy                                                                    | alive 125 m |                                                | [55] |
| 1 | 2016 | Loos, Delaere | Leuven, Belgium | University Hospital Leuven                        | 57 | M | tumor               | heterotopic/orthotopic allotransplant |                                                                                 | died 34 m   | other cause                                    | [55] |
| 1 | 2016 | Loos, Delaere | Leuven, Belgium | University Hospital Leuven                        | 60 | M | tumor               | heterotopic/orthotopic allotransplant | tracheocutaneous fistula                                                        | died 38 m   | recurrence                                     | [55] |
| 1 | 2016 | Loos, Delaere | Leuven, Belgium | University Hospital Leuven                        | 63 | M | tumor               | heterotopic/orthotopic allotransplant |                                                                                 | alive 122 m |                                                | [55] |
| 1 | 2016 | Loos, Delaere | Leuven, Belgium | University Hospital Leuven                        | 52 | F | tumor               | heterotopic/orthotopic allotransplant |                                                                                 | alive 116 m |                                                | [55] |
| 1 | 2016 | Loos, Delaere | Leuven, Belgium | University Hospital Leuven                        | 71 | M | tumor               | heterotopic/orthotopic allotransplant | tracheostomy, percutaneous endoscopic gastrostomy & pneumonia                   | died 56 m   | other cause                                    | [55] |
| 1 | 2016 | Loos, Delaere | Leuven, Belgium | University Hospital Leuven                        | 65 | M | tumor               | heterotopic/orthotopic allotransplant |                                                                                 | alive 113 m |                                                | [55] |
| 1 | 2016 | Loos, Delaere | Leuven, Belgium | University Hospital Leuven                        | 61 | M | tumor               | heterotopic/orthotopic allotransplant |                                                                                 | alive 103 m |                                                | [55] |
| 1 | 2016 | Loos, Delaere | Leuven, Belgium | University Hospital Leuven                        | 57 | M | tumor               | heterotopic/orthotopic allotransplant | wound infection                                                                 | alive 98 m  |                                                | [55] |
| 1 | 2016 | Loos, Delaere | Leuven, Belgium | University Hospital Leuven                        | 48 | F | tumor               | heterotopic/orthotopic allotransplant | tracheocutaneous fistula                                                        | alive 96 m  |                                                | [55] |
| 1 | 2016 | Loos, Delaere | Leuven, Belgium | University Hospital Leuven                        | 71 | M | tumor               | heterotopic/orthotopic allotransplant | total laryngectomy                                                              | died 37 m   | other cause                                    | [55] |
| 1 | 2016 | Loos, Delaere | Leuven, Belgium | University Hospital Leuven                        | 68 | F | tumor               | heterotopic/orthotopic allotransplant | total laryngectomy                                                              | died 74 m   | other cause                                    | [55] |
| 1 | 2016 | Loos, Delaere | Leuven, Belgium | University Hospital Leuven                        | 59 | M | tumor               | heterotopic/orthotopic allotransplant | bleeding & wound infection                                                      | alive 81 m  |                                                | [55] |
| 1 | 2016 | Loos, Delaere | Leuven, Belgium | University Hospital Leuven                        | 57 | M | tumor               | heterotopic/orthotopic allotransplant |                                                                                 | alive 55 m  |                                                | [55] |
| 1 | 2016 | Loos, Delaere | Leuven, Belgium | University Hospital Leuven                        | 67 | M | tumor               | heterotopic/orthotopic allotransplant |                                                                                 | alive 54 m  |                                                | [55] |
| 1 | 2016 | Loos, Delaere | Leuven, Belgium | University Hospital Leuven                        | 47 | M | tumor               | heterotopic/orthotopic allotransplant | pneumonia & tracheocutaneous fistula                                            | alive 53 m  |                                                | [55] |
| 1 | 2016 | Loos, Delaere | Leuven, Belgium | University Hospital Leuven                        | 73 | M | tumor               | heterotopic/orthotopic allotransplant | total laryngectomy, pneumonia & wound infection                                 | alive 50 m  |                                                | [55] |
| 1 | 2016 | Loos, Delaere | Leuven, Belgium | University Hospital Leuven                        | 71 | M | tumor               | heterotopic/orthotopic allotransplant | tracheostomy                                                                    | alive 46 m  |                                                | [55] |
| 1 | 2016 | Loos, Delaere | Leuven, Belgium | University Hospital Leuven                        | 54 | M | tumor               | heterotopic/orthotopic allotransplant | weak voice & pneumonia                                                          | alive 25 m  |                                                | [55] |
| 1 | 2016 | Loos, Delaere | Leuven, Belgium | University Hospital Leuven                        | 57 | M | tumor               | heterotopic/orthotopic allotransplant | weak voice                                                                      | alive 24 m  |                                                | [55] |
| 1 | 2016 | Loos, Delaere | Leuven, Belgium | University Hospital Leuven                        | 67 | M | tumor               | heterotopic/orthotopic allotransplant | tracheostomy, percutaneous endoscopic gastrostomy, wound infection, & pneumonia | alive 15 m  |                                                | [55] |
| 1 | 2016 | Loos, Delaere | Leuven, Belgium | University Hospital Leuven                        | 65 | F | tumor               | heterotopic/orthotopic allotransplant | tracheostomy                                                                    | alive 12 m  |                                                | [55] |
| 1 | 2017 | Elliott       | London, England | Great Ormond Street, Hospital for Children (GOSH) | 15 | F | congenital stenosis | decellularized allograft              | stricture, collapse                                                             | died 15 d   | hypothesized acute extrinsic compressive event | [66] |

|                  |      |          |                     |                            |    |   |                      |                                                   |                                                                                 |            |            |      |
|------------------|------|----------|---------------------|----------------------------|----|---|----------------------|---------------------------------------------------|---------------------------------------------------------------------------------|------------|------------|------|
| 1                | 2017 | Martinod | Bobigny, France     | Hôpitaux de Paris          | 58 | F | prolonged intubation | cryopreserved aortic allograft                    | acute laryngeal edema, stent bacterial infection & removal, closed tracheostomy | alive 67 m |            | [61] |
| 1                | 2017 | Martinod | Bobigny, France     | Hôpitaux de Paris          | 33 | M | prolonged intubation | cryopreserved aortic allograft                    | stent granuloma & removal, closed tracheostomy                                  | alive 55 m |            | [61] |
| 1                | 2018 | Kolb     | Villejuif, France   | Institut Gustave Roussy    | 12 | F | congenital stenosis  | dorsi free flap + chondrocartilage ribs autograft | daily aspirations                                                               | alive 44 m |            | [8]  |
| 1                | 2018 | Thomet   | Geneva, Switzerland | Geneva University Hospital | 35 | M | tumor                | stented autograft                                 | stent removed 4 m                                                               | died 27 m  | recurrence | [10] |
| 1                | 2018 | Thomet   | Geneva, Switzerland | Geneva University Hospital | 70 | M | tumor                | stented autograft                                 |                                                                                 | alive 3 y  |            | [10] |
| <b>290 Total</b> |      |          |                     |                            |    |   |                      |                                                   |                                                                                 |            |            |      |
